# Supplementary material
Source: PubMed Central journal article supplement (PMC4598412)
Supplement: IAI.00653-15_zii999091439so1.pdf [file IAI.00653-15_zii999091439so1.pdf]

**Supplementary Materials:**

**An MdsABC-Mediated Pathway for Pathogenicity in *Salmonella*  
Typhimurium**

Saemee Song<sup>1,3</sup>, Boeun Lee<sup>1</sup>, Ji-Hyun Yeom<sup>1</sup>, Soonhye Hwang<sup>1</sup>, Ilnam Kang<sup>2</sup>, Jang-Cheon  
Cho<sup>2</sup>, Nam-Chul Ha<sup>3</sup>, Jeehyeon Bae<sup>4</sup>, Kangseok Lee<sup>1\*</sup>, and Yong-Hak Kim<sup>5\*</sup>

<sup>1</sup>Department of Life Science, Chung-Ang University, Seoul, Republic of Korea

<sup>2</sup>Department of Biological Sciences, Inha University, Incheon, Republic of Korea

<sup>3</sup>Department of Food and Animal Biotechnology, Department of Agricultural Biotechnology,  
Seoul National University, Seoul, Republic of Korea

<sup>4</sup>College of Pharmacy, Chung-Ang University, Seoul, Republic of Korea

<sup>5</sup>Department of Microbiology, Catholic University of Daegu School of Medicine, Daegu,  
Republic of Korea.

### A qRT-PCR

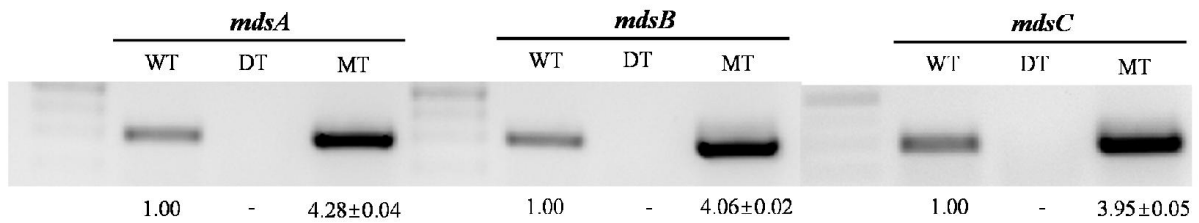

### B Western blots

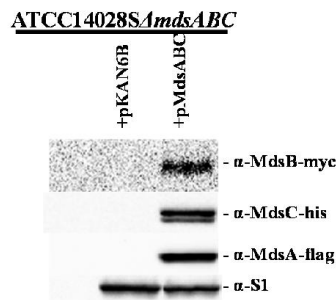

**FIG S1** Arabinose-induced expression levels of the *mdsABC* genes in the MdsABC expression mutant (MT) strain of *Salmonella enterica* Typhimurium 14028S. (A) Results from reverse-transcriptase and polymerase chain reaction (RT-PCR) for the determination of relative expression (mRNA) levels of *mdsABC* gene transcripts in the RNA extracts of wild-type (WT), *mdsABC* deletion (DT), and *mdsABC* expression mutant (MT) strains of *S. Typhimurium* 14028S cultivated with LB medium containing 0.1% arabinose. Relative levels of *mdsABC* expression in the MT strain were calculated after normalization to the corresponding gene expression levels in the WT strain. Results from three independent samples are reported as means  $\pm$  standard deviations. Dashes, not detected. (B) Western blot analysis of MdsABC proteins expressed with flag, *c*-myc, and hexahistidine tags in the MT strain containing the pMdsABC expression vector, but not expressed in the WT strain containing the empty pKAN6B plasmid. The RpsA (S1) protein was detected as a housekeeping protein to compare the protein expression levels. The western blot analysis was performed with appropriate antibodies, as described in the previous study (Song *et al.*, 2014).

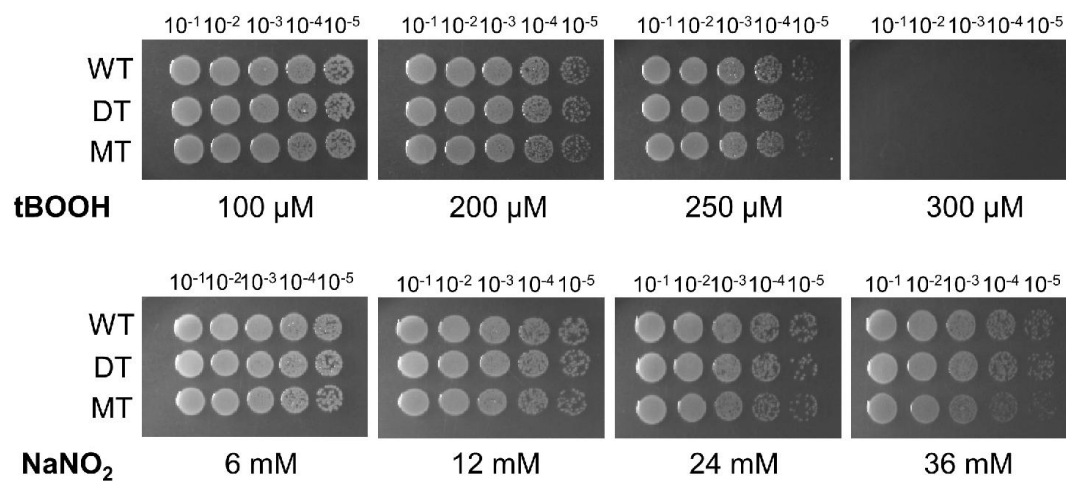

**FIG S2** Effects of MdsABC on resistance to t-BOOH and NaNO<sub>2</sub>. Spot dilution assays of the wild-type (WT), *mdsABC* deletion (DT), and *mdsABC* expression mutant (MT) strains of *S. Typhimurium* 14028S on LB agar plates containing appropriate concentrations of t-BOOH, and NaNO<sub>2</sub>. Colony growth was observed after 12-18 h of incubation at 37°C. Overexpression of MdsABC had no effect on bacterial resistance to t-BOOH and NaNO<sub>2</sub>.

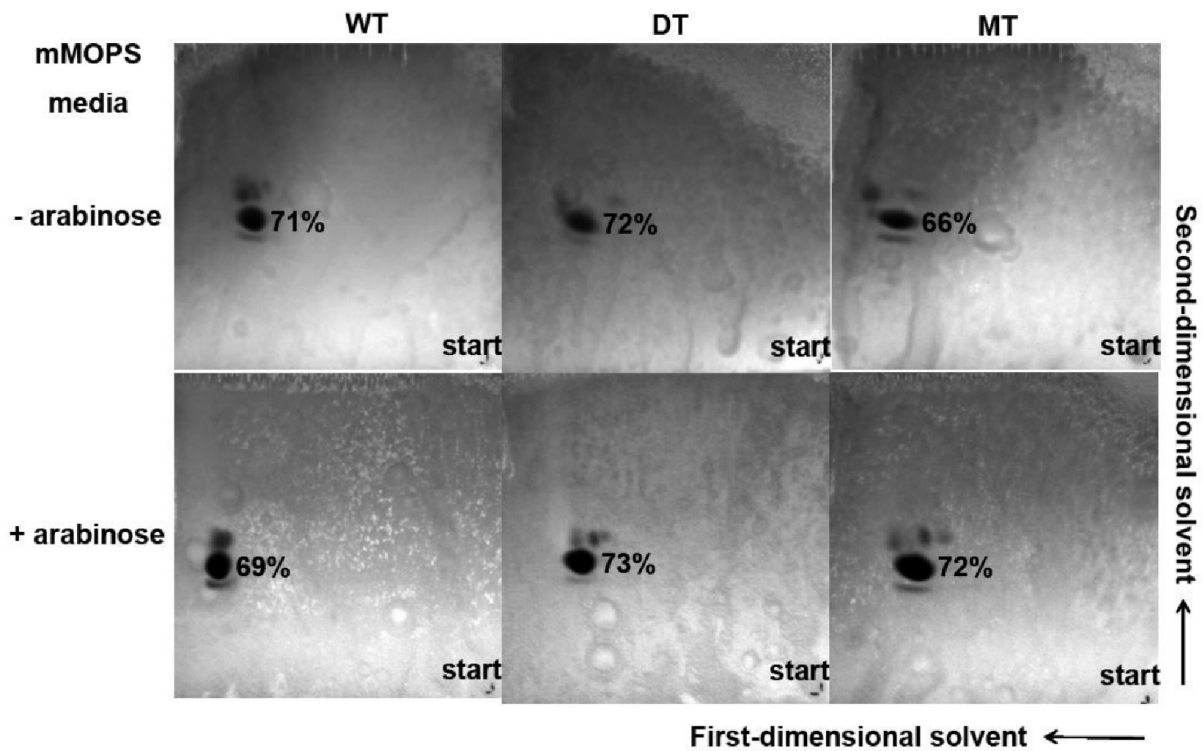

**FIG S3** Two-dimensional TLC analysis of cellular phospholipids. Phospholipids were extracted from the WT (wild-type), DT ( $\Delta mdsABC$ ), and MT (pMdsABC) strains of *Salmonella* Typhimurium 14028S cultivated in mMOPS media in the presence or absence of 0.1% arabinose. Two-dimensional TLC of the cellular lipids was conducted using chloroform-methanol-water-28% aqueous ammonia (130:70:8:0.5 by volume) in the first dimension followed by chloroform-acetone-methanol-acetic acid-water (100:40:20:20:10 by volume) in the second. Phospholipid spots were visualized by molybdenum blue staining solution spray, and the percentage of PL-1 compound area, analyzed using ImageQuant software (GE Healthcare Life Sciences), is shown in each silica gel.

**A** negative-ion CID mass spectrum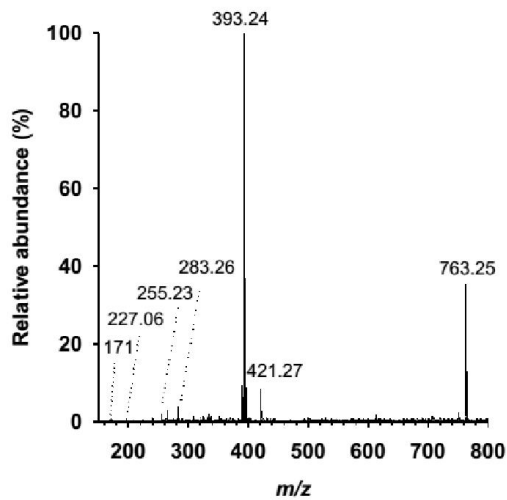**B** tandem mass spectrum of  $m/z$  227.06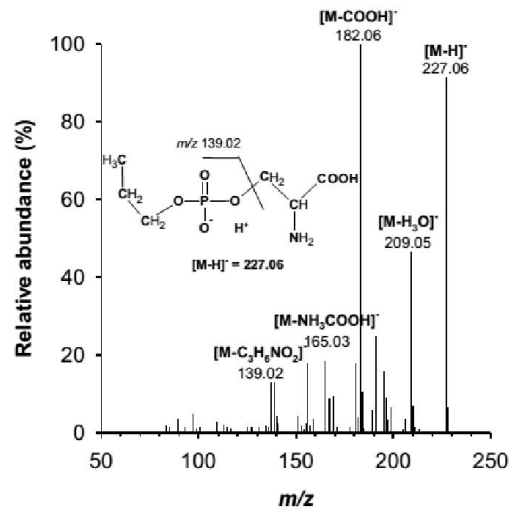**C** tandem mass spectrum of  $m/z$  393.24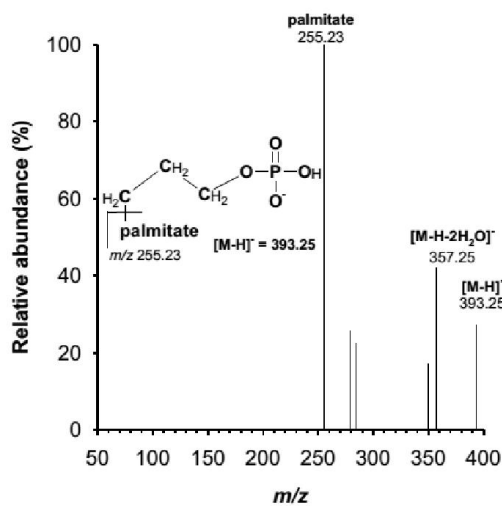**D** tandem mass spectrum of  $m/z$  421.27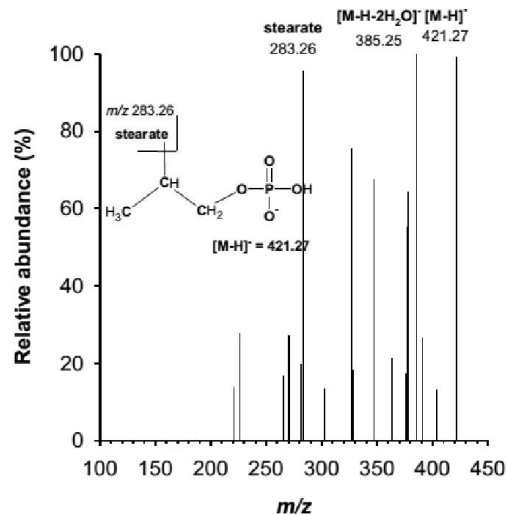**E** tandem mass spectrum of  $m/z$  763.54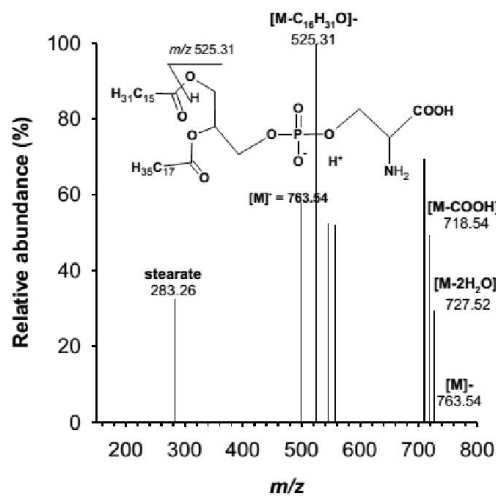**F** chemical structure of PL-1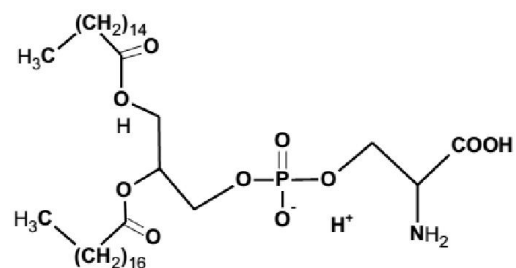

**FIG S4** Mass analysis of purified PL-1 hypersecreted from *mdsABC*-overexpressing mutant (MT) bacteria of *Salmonella* Typhimurium 14028S. (A) Electrospray and collision-induced fragmentation of PL-1 in the negative-ion mode. (B) Tandem mass spectrum of the  $m/z$  277.06 ion, assigned to the CID fragments of propyl phosphoserine. (C) Tandem mass spectrum of the  $m/z$  393.24 ion, assigned to the CID fragments of 1-palmitoyl-2-deoxyglycero-3-phosphate. (D) Tandem mass spectrum of the  $m/z$  421.27 ion, assigned to the CID fragments of 2-stearoyl-1-deoxyglycero-3-phosphate. (E) Tandem mass spectrum of the  $m/z$  763.54 ion, assigned to the molecular ion and fragment ions generated from 1-palmitoyl-2-stearoyl-*sn*-glycero-3-phosphoserine (phosphatidylserine). (F) Proposed chemical structure of 1-palmitoyl-2-stearoyl-phosphatidylserine (PSPS) identified by ESI/CID mass spectrometry in negative-ion mode.

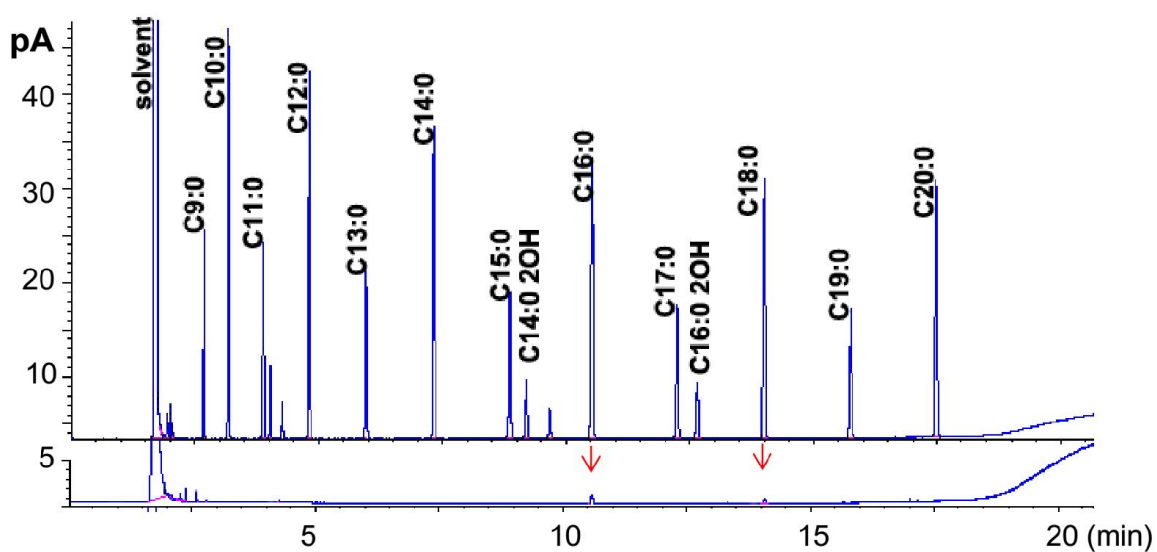

**FIG S5** Gas chromatograms of fatty acid methyl ester MIDI standards (upper) and methyl esters derived from purified PL-1 compound (bottom). The two peaks derived from the PL-1 sample, which eluted at 10.52 and 14.01 min, correspond to palmitate (C16:0) and stearate (C18:0) methyl esters, respectively, as indicated by arrows.

**FIG S6(A-K)** Tandem mass spectra and assigned *b*- and *y*-ions of reactive cysteine-containing peptides of membrane-bound proteins. Proteins have the potential to form intermolecular disulfide bonds via diamide-mediated *S*-thiolation, as shown in Fig. 5A in the main text. To distinguish between free cysteine and DTT reduced cysteine thiol groups, free cysteine residues of proteins were blocked with *N*-ethylmaleimide prior to iodoacetamide modification (carbamidomethylation) of DTT reduced cysteine residues..

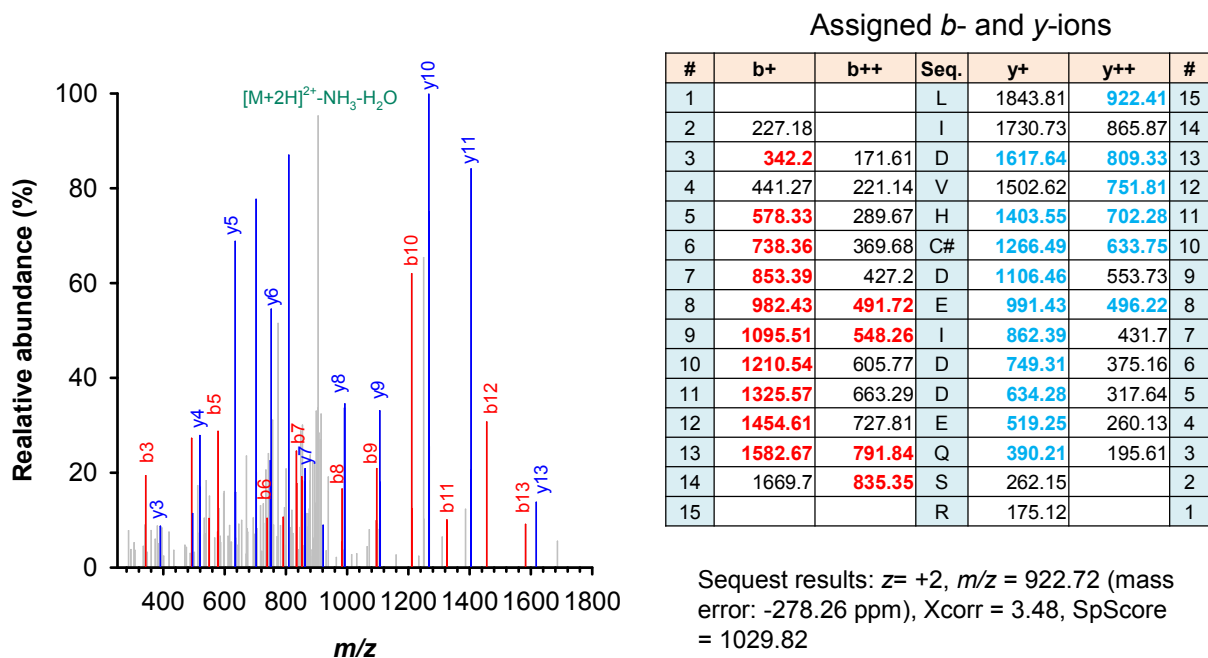

**FIG S6(A)** Assignment of the tandem mass spectrum to predicted *b*- and *y*-ions of cysteine deaminase (CodA) <sup>210</sup>LIDVHC#DEIDDEQSR<sup>224</sup>, which forms an intermolecular disulfide bond at Cys215.



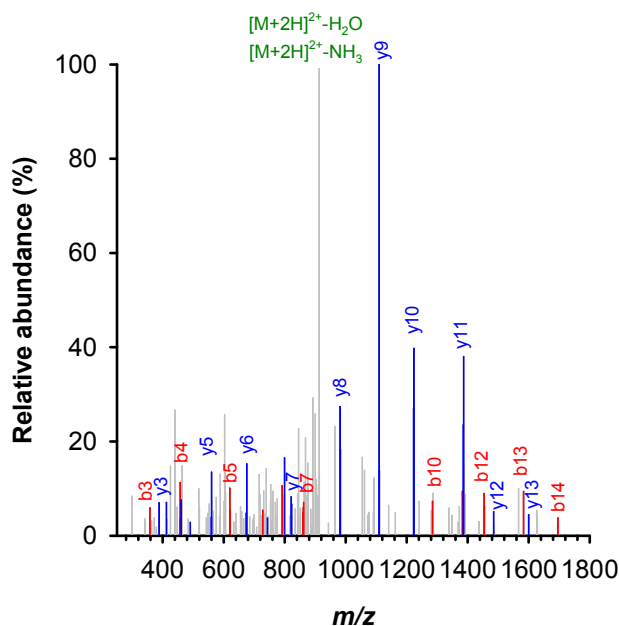

Assigned *b*- and *y*-ions

| #  | b+             | b++           | Seq. | y+             | y++           | #  |
|----|----------------|---------------|------|----------------|---------------|----|
| 1  |                |               | Q    | 1841.87        | 921.44        | 15 |
| 2  | 244.09         |               | D    | 1713.81        | 857.41        | 14 |
| 3  | <b>358.14</b>  | 179.57        | N    | <b>1598.79</b> | <b>799.9</b>  | 13 |
| 4  | <b>457.2</b>   | 229.11        | V    | <b>1484.74</b> | <b>742.88</b> | 12 |
| 5  | <b>620.27</b>  | 310.64        | Y    | <b>1385.68</b> | 693.34        | 11 |
| 6  | 733.35         | 367.18        | L    | <b>1222.61</b> | 611.81        | 10 |
| 7  | <b>861.41</b>  | 431.21        | Q    | <b>1109.53</b> | 555.27        | 9  |
| 8  | 1021.44        | 511.22        | C#   | <b>981.47</b>  | <b>491.24</b> | 8  |
| 9  | 1168.51        | 584.76        | F    | <b>821.44</b>  | <b>411.22</b> | 7  |
| 10 | <b>1283.54</b> | 642.27        | D    | <b>674.37</b>  | 337.69        | 6  |
| 11 | <b>1382.61</b> | 691.81        | V    | <b>559.34</b>  | 280.18        | 5  |
| 12 | <b>1453.64</b> | <b>727.32</b> | A    | <b>460.28</b>  | 230.64        | 4  |
| 13 | <b>1582.68</b> | <b>791.85</b> | E    | <b>389.24</b>  | 195.12        | 3  |
| 14 | <b>1695.77</b> | 848.39        | L    | 260.2          |               | 2  |
| 15 |                |               | K    | 147.11         |               | 1  |

Sequest results:  $z = +2$ ,  $m/z = 921.97$  (mass error: -68.95 ppm), Xcorr = 3.21, SpScore = 1174.74

**FIG S6(B)** Assignment of the tandem mass spectrum to predicted *b*- and *y*-ions of glycerophosphodiester phosphodiesterase (GlpQ) <sup>199</sup>QDNVYLQC#FDVAELK<sup>213</sup>, which forms an intermolecular disulfide bond at Cys206.

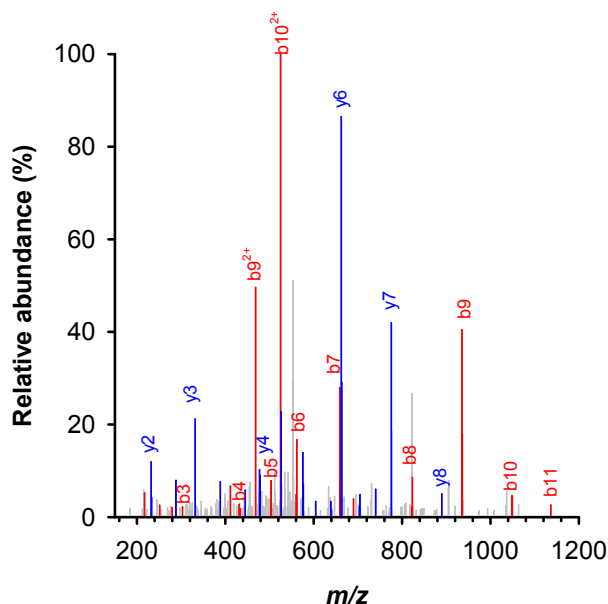

Assigned *b*- and *y*-ions

| #  | b              | b++           | Seq. | y             | y++           | #  |
|----|----------------|---------------|------|---------------|---------------|----|
| 1  |                |               | A    | 1709.87       | 855.44        | 16 |
| 2  | <b>232.08</b>  |               | C#   | 1638.83       | 819.92        | 15 |
| 3  | <b>303.11</b>  | 152.06        | A    | 1478.8        | <b>739.9</b>  | 14 |
| 4  | <b>432.16</b>  | <b>216.58</b> | E    | 1407.76       | <b>704.38</b> | 13 |
| 5  | <b>503.19</b>  | <b>252.1</b>  | A    | 1278.72       | <b>639.86</b> | 12 |
| 6  | <b>560.21</b>  | <b>280.61</b> | G    | 1207.68       | <b>604.35</b> | 11 |
| 7  | <b>659.28</b>  | 330.14        | V    | 1150.66       | <b>575.83</b> | 10 |
| 8  | <b>822.35</b>  | <b>411.68</b> | Y    | 1051.59       | <b>526.3</b>  | 9  |
| 9  | <b>935.43</b>  | <b>468.22</b> | L    | <b>888.53</b> | <b>444.77</b> | 8  |
| 10 | <b>1048.51</b> | <b>524.76</b> | I    | <b>775.45</b> | <b>388.23</b> | 7  |
| 11 | <b>1135.55</b> | 568.28        | S    | <b>662.36</b> | <b>331.68</b> | 6  |
| 12 | 1232.6         | 616.8         | P    | <b>575.33</b> | <b>288.17</b> | 5  |
| 13 | 1379.67        | <b>690.34</b> | F    | <b>478.28</b> | 239.64        | 4  |
| 14 | 1478.74        | <b>739.87</b> | V    | <b>331.21</b> | 166.11        | 3  |
| 15 | 1535.76        | 768.38        | G    | <b>232.14</b> |               | 2  |
| 16 |                |               | R    | 175.12        |               | 1  |

Sequest results:  $z = +3$ ,  $m/z = 570.89$  (mass error: -201.88 ppm), Xcorr = 3.55, SpScore = 1412.76

**FIG S6(C)** Assignment of the tandem mass spectrum to predicted *b*- and *y*-ions of transaldolase B (TalB) <sup>166</sup>AC#AEAGVYLISPFVGR<sup>181</sup>, which forms an intermolecular disulfide bond at Cys167.

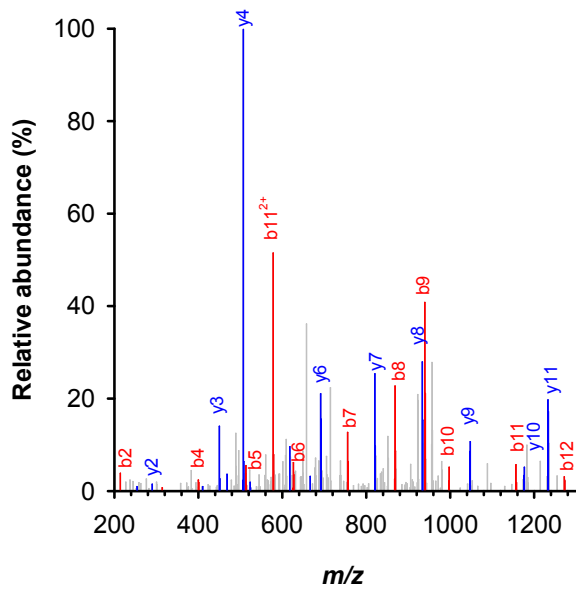

### Assigned *b*- and *y*-ions

| #  | <i>b</i> | <i>b</i> ++ | Seq. | <i>y</i> | <i>y</i> ++ | #  |
|----|----------|-------------|------|----------|-------------|----|
| 1  |          |             | N    | 1445.71  | 723.36      | 13 |
| 2  | 214.12   |             | V    | 1331.66  | 666.33      | 12 |
| 3  | 271.14   |             | G    | 1232.59  | 616.8       | 11 |
| 4  | 400.18   | 200.6       | E    | 1175.57  | 588.29      | 10 |
| 5  | 513.27   | 257.14      | I    | 1046.53  | 523.77      | 9  |
| 6  | 626.35   | 313.68      | L    | 933.45   | 467.23      | 8  |
| 7  | 755.39   | 378.2       | E    | 820.36   | 410.68      | 7  |
| 8  | 868.48   | 434.74      | L    | 691.32   | 346.16      | 6  |
| 9  | 939.52   | 470.26      | A    | 578.23   | 289.62      | 5  |
| 10 | 996.54   | 498.77      | G    | 507.2    | 254.1       | 4  |
| 11 | 1156.57  | 578.79      | C#   | 450.18   | 225.59      | 3  |
| 12 | 1271.59  | 636.3       | D    | 290.15   |             | 2  |
| 13 |          |             | R    | 175.12   |             | 1  |

Sequest results:  $z = +2$ ,  $m/z = 723.74$  (mass error: -111.11 ppm), Xcorr = 3.89, SpScore = 1551.42

**FIG S6(D)** Assignment of the tandem mass spectrum to the predicted *b*- and *y*-ions of transaldolase B (TalB)  $^{229}\text{NVGEILELAGC}\#\text{DR}^{241}$ , which forms an intermolecular disulfide bond at Cys239.

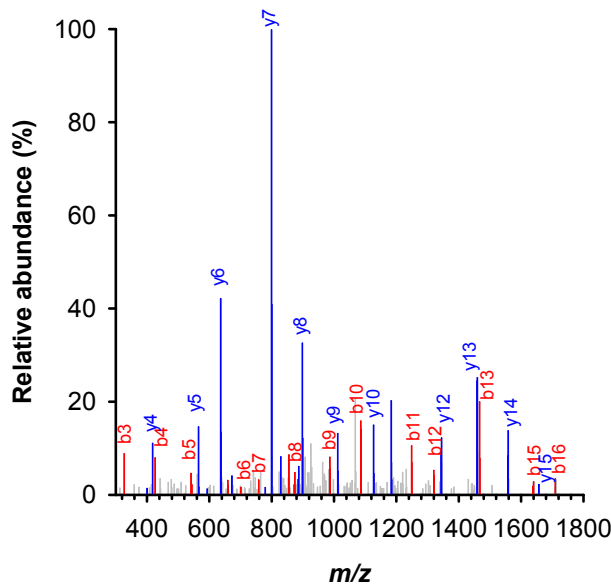

### Assigned *b*- and *y*-ions

| #  | <i>b</i> + | <i>b</i> ++ | Seq. | <i>y</i> + | <i>y</i> ++ | #  |
|----|------------|-------------|------|------------|-------------|----|
| 1  |            |             | L    | 1883.9     | 942.45      | 17 |
| 2  | 228.13     |             | N    | 1770.81    | 885.91      | 16 |
| 3  | 327.2      | 164.11      | V    | 1656.77    | 828.89      | 15 |
| 4  | 426.27     | 213.64      | V    | 1557.7     | 779.35      | 14 |
| 5  | 541.3      | 271.15      | D    | 1458.63    | 729.82      | 13 |
| 6  | 701.33     | 351.17      | C#   | 1343.6     | 672.31      | 12 |
| 7  | 758.35     | 379.68      | G    | 1183.57    | 592.29      | 11 |
| 8  | 873.38     | 437.19      | D    | 1126.55    | 563.78      | 10 |
| 9  | 986.46     | 493.73      | L    | 1011.53    | 506.27      | 9  |
| 10 | 1085.53    | 543.27      | V    | 898.44     | 449.72      | 8  |
| 11 | 1248.59    | 624.8       | Y    | 799.37     | 400.19      | 7  |
| 12 | 1319.63    | 660.32      | A    | 636.31     | 318.66      | 6  |
| 13 | 1466.7     | 733.85      | F    | 565.27     | 283.14      | 5  |
| 14 | 1523.72    | 762.36      | G    | 418.2      | 209.61      | 4  |
| 15 | 1638.75    | 819.88      | D    | 361.18     | 181.09      | 3  |
| 16 | 1709.78    | 855.4       | A    | 246.16     |             | 2  |
| 17 |            |             | R    | 175.12     |             | 1  |

Sequest results:  $z = +2$ ,  $m/z = 942.72$  (mass error: -361.49 ppm), Xcorr = 5.49, SpScore = 1657.42

**FIG S6(E)** Assignment of the tandem mass spectrum to the predicted *b*- and *y*-ions of agmatinase (SpeB)  $83\text{LNVVDC}\#\text{GDLVYAFGDAR}99$ , which forms an intermolecular disulfide bond at Cys167.

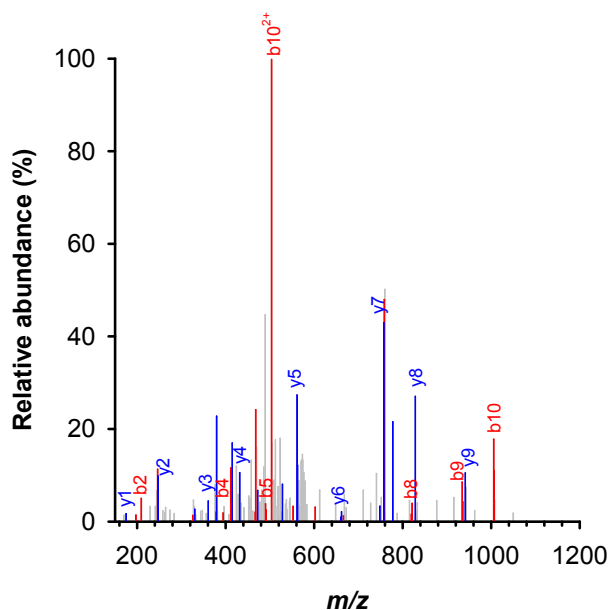

### Assigned *b*- and *y*-ions

| #  | b+             | b++           | Seq. | y+            | y++           | #  |
|----|----------------|---------------|------|---------------|---------------|----|
| 1  |                |               | A    | 1761.91       | 881.46        | 17 |
| 2  | <b>209.1</b>   |               | H    | 1690.87       | 845.94        | 16 |
| 3  | 266.13         |               | G    | 1553.81       | <b>777.41</b> | 15 |
| 4  | <b>394.22</b>  | <b>197.61</b> | K    | 1496.79       | <b>748.9</b>  | 14 |
| 5  | <b>491.27</b>  | <b>246.14</b> | P    | 1368.69       | 684.85        | 13 |
| 6  | 651.3          | <b>326.16</b> | C#   | 1271.64       | 636.32        | 12 |
| 7  | 708.33         | 354.67        | G    | 1111.61       | 556.31        | 11 |
| 8  | <b>821.41</b>  | <b>411.21</b> | I    | 1054.59       | <b>527.8</b>  | 10 |
| 9  | <b>934.49</b>  | <b>467.75</b> | L    | <b>941.5</b>  | <b>471.26</b> | 9  |
| 10 | <b>1005.53</b> | <b>503.27</b> | A    | <b>828.42</b> | <b>414.71</b> | 8  |
| 11 | 1102.58        | <b>551.8</b>  | P    | <b>757.38</b> | <b>379.2</b>  | 7  |
| 12 | 1201.65        | <b>601.33</b> | V    | <b>660.33</b> | <b>330.67</b> | 6  |
| 13 | 1330.69        | <b>665.85</b> | E    | <b>561.26</b> | 281.13        | 5  |
| 14 | 1401.73        | 701.37        | A    | <b>432.22</b> | 216.61        | 4  |
| 15 | 1516.76        | <b>758.88</b> | D    | <b>361.18</b> | 181.09        | 3  |
| 16 | 1587.8         | 794.4         | A    | <b>246.16</b> |               | 2  |
| 17 |                |               | R    | <b>175.12</b> |               | 1  |

Sequest results:  $z = +3$ ,  $m/z = 588.54$  (mass error: +325.79 ppm), Xcorr = 3.67, SpScore = 772.98

**FIG S6(F)** Assignment of the tandem mass spectrum to the predicted *b*- and *y*-ions of  $\alpha$ -dehydro- $\beta$ -deoxy-D-glucarate aldolase <sup>208</sup>AHGKPC#GILAPVEADAR<sup>224</sup>, which forms an intermolecular disulfide bond at Cys213.

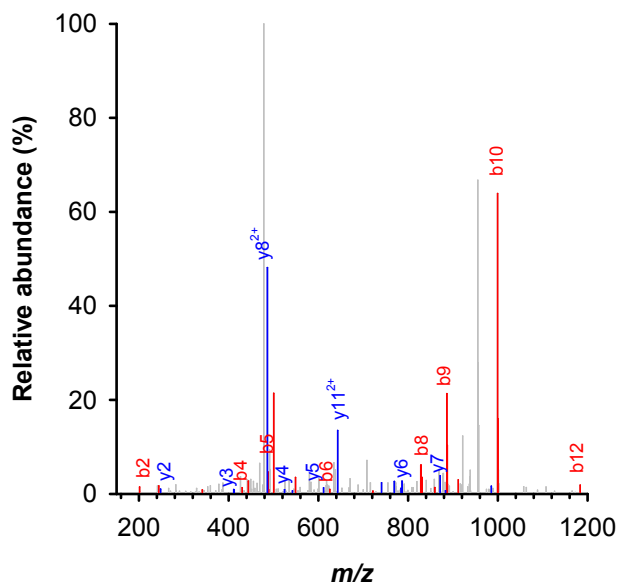

### Assigned *b*- and *y*-ions

| #  | b+             | b++           | Seq. | y+            | y++           | #  |
|----|----------------|---------------|------|---------------|---------------|----|
| 1  |                |               | I    | 1967.94       | <b>984.47</b> | 18 |
| 2  | <b>201.12</b>  |               | S    | 1854.85       | 927.93        | 17 |
| 3  | 300.19         | 150.6         | V    | 1767.82       | <b>884.41</b> | 16 |
| 4  | <b>431.23</b>  | 216.12        | M    | 1668.75       | 834.88        | 15 |
| 5  | <b>488.25</b>  | <b>244.63</b> | G    | 1537.71       | <b>769.36</b> | 14 |
| 6  | <b>625.31</b>  | 313.16        | H    | 1480.69       | <b>740.85</b> | 13 |
| 7  | 682.33         | <b>341.67</b> | G    | 1343.63       | 672.32        | 12 |
| 8  | <b>829.37</b>  | 415.19        | M*   | 1286.61       | <b>643.81</b> | 11 |
| 9  | <b>886.39</b>  | <b>443.7</b>  | G    | 1139.58       | 570.29        | 10 |
| 10 | <b>999.48</b>  | <b>500.24</b> | I    | 1082.55       | <b>541.78</b> | 9  |
| 11 | 1096.53        | <b>548.77</b> | P    | 969.47        | <b>485.24</b> | 8  |
| 12 | <b>1183.56</b> | 592.28        | S    | <b>872.42</b> | 436.71        | 7  |
| 13 | 1357.61        | 679.31        | C#   | <b>785.39</b> | 393.2         | 6  |
| 14 | 1444.64        | <b>722.82</b> | S    | <b>611.34</b> | 306.17        | 5  |
| 15 | 1557.72        | 779.37        | I    | <b>524.31</b> | 262.66        | 4  |
| 16 | 1720.79        | <b>860.9</b>  | Y    | <b>411.22</b> | 206.12        | 3  |
| 17 | 1821.83        | <b>911.42</b> | T    | <b>248.16</b> |               | 2  |
| 18 |                |               | K    | 147.11        |               | 1  |

Sequest results: oxidation of M65,  $z = +3$ ,  $m/z = 652.34$  (mass error: -161.73 ppm), Xcorr = 2.88, SpScore = 700.74

**FIG S6(G)** Assignment of the tandem mass spectrum to the predicted *b*- and *y*-ions of purine nucleoside phosphorylase (DeoD) <sup>58</sup>ISVMGHGM\*GIPSC#SIYTK<sup>75</sup>, which forms an intermolecular disulfide bond at Cys70.

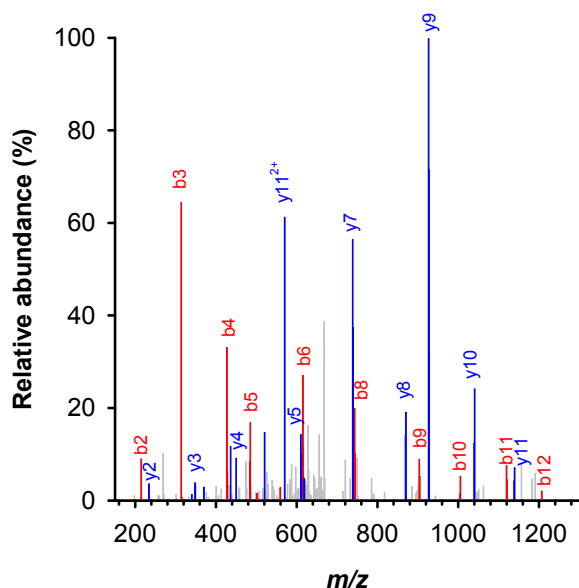

**Assigned *b*- and *y*-ions**

| #  | b+             | b++           | Seq. | y+             | y++           | #  |
|----|----------------|---------------|------|----------------|---------------|----|
| 1  |                |               | D    | 1352.62        | 676.81        | 13 |
| 2  | <b>215.1</b>   |               | V    | 1237.59        | <b>619.3</b>  | 12 |
| 3  | <b>314.17</b>  | 157.59        | V    | <b>1138.52</b> | <b>569.76</b> | 11 |
| 4  | <b>427.26</b>  | <b>214.13</b> | I    | <b>1039.45</b> | <b>520.23</b> | 10 |
| 5  | <b>484.28</b>  | 242.64        | G    | <b>926.37</b>  | 463.69        | 9  |
| 6  | <b>615.32</b>  | 308.16        | M    | <b>869.35</b>  | <b>435.18</b> | 8  |
| 7  | 672.34         | 336.67        | G    | <b>738.31</b>  | <b>369.66</b> | 7  |
| 8  | <b>743.38</b>  | 372.19        | A    | 681.29         | <b>341.15</b> | 6  |
| 9  | <b>903.41</b>  | 452.21        | C#   | <b>610.25</b>  | 305.63        | 5  |
| 10 | <b>1004.45</b> | <b>502.73</b> | T    | <b>450.22</b>  | 225.61        | 4  |
| 11 | <b>1119.48</b> | <b>560.24</b> | D    | <b>349.17</b>  | 175.09        | 3  |
| 12 | <b>1206.51</b> | 603.76        | S    | <b>234.14</b>  |               | 2  |
| 13 |                |               | K    | 147.11         |               | 1  |

Sequest results:  $z = +2$ ,  $m/z = 677.58$  (mass error: +431.88 ppm), Xcorr = 3.82, SpScore = 1153.89

**FIG S6(H)** Assignment of the tandem mass spectrum to the predicted *b*- and *y*-ions of purine nucleoside phosphorylase (DeoD) <sup>103</sup>DVVIGMGAC#TDSK<sup>115</sup>, which forms an intermolecular disulfide bond at Cys111.

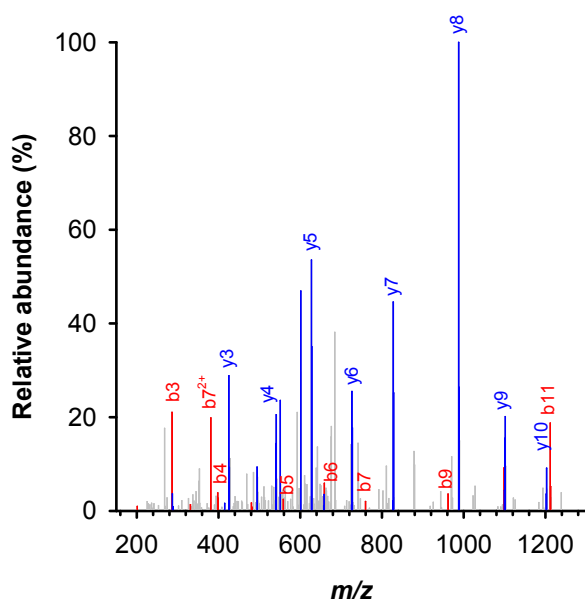

**Assigned *b*- and *y*-ions**

| #  | b+             | b++           | Seq. | y+             | y++           | #  |
|----|----------------|---------------|------|----------------|---------------|----|
| 1  |                |               | A    | 1385.72        | 693.36        | 12 |
| 2  | 185.13         |               | L    | 1314.68        | <b>657.85</b> | 11 |
| 3  | <b>286.18</b>  |               | T    | <b>1201.6</b>  | <b>601.3</b>  | 10 |
| 4  | <b>399.26</b>  | <b>200.13</b> | I    | <b>1100.55</b> | <b>550.78</b> | 9  |
| 5  | <b>559.29</b>  | 280.15        | C#   | <b>987.47</b>  | <b>494.24</b> | 8  |
| 6  | <b>660.34</b>  | <b>330.67</b> | T    | <b>827.44</b>  | <b>414.22</b> | 7  |
| 7  | <b>759.41</b>  | <b>380.21</b> | V    | <b>726.39</b>  | 363.7         | 6  |
| 8  | 846.44         | 423.72        | S    | <b>627.32</b>  | 314.16        | 5  |
| 9  | <b>961.47</b>  | <b>481.24</b> | D    | <b>540.29</b>  | 270.65        | 4  |
| 10 | <b>1098.53</b> | 549.77        | H    | <b>425.26</b>  | 213.13        | 3  |
| 11 | <b>1211.61</b> | 606.31        | I    | <b>288.2</b>   |               | 2  |
| 12 |                |               | R    | 175.12         |               | 1  |

Sequest results:  $z = +2$ ,  $m/z = 693.68$  (mass error: -188.23 ppm), Xcorr = 2.97, SpScore = 950.20

**FIG S6(I)** Assignment of the tandem mass spectrum to the predicted *b*- and *y*-ions of purine nucleoside phosphorylase (DeoD) <sup>197</sup>ALTIC#TVSDHIR<sup>208</sup>, which forms an intermolecular disulfide bond at Cys201.

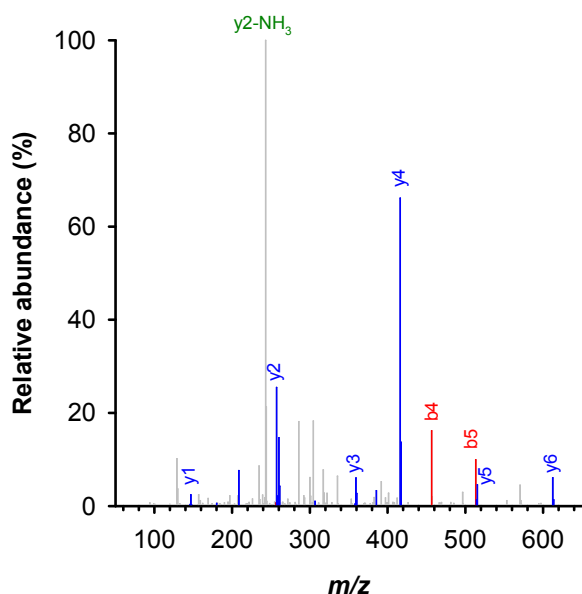

### Assigned *b*- and *y*-ions

| # | <i>b</i> <sup>+</sup> | <i>b</i> <sup>++</sup> | Seq. | <i>y</i> <sup>+</sup> | <i>y</i> <sup>++</sup> | # |
|---|-----------------------|------------------------|------|-----------------------|------------------------|---|
| 1 |                       |                        | C#   | 871.52                | 436.26                 | 8 |
| 2 | 260.12                |                        | R    | 768.51                | 384.76                 | 7 |
| 3 | 357.17                | 179.09                 | P    | 612.41                | 306.71                 | 6 |
| 4 | 456.24                | 228.62                 | V    | 515.35                | 258.18                 | 5 |
| 5 | 513.26                | 257.13                 | G    | 416.29                | 208.65                 | 4 |
| 6 | 612.33                | 306.67                 | V    | 359.26                | 180.14                 | 3 |
| 7 | 725.41                | 363.21                 | L    | 260.2                 |                        | 2 |
| 8 |                       |                        | K    | 147.11                |                        | 1 |

Sequest results:  $z = +3$ ,  $m/z = 310.40$  (mass error: -4.16 ppm), Xcorr = 2.62, SpScore = 916.78

**FIG S6(J)** Assignment of the tandem mass spectrum to the predicted *b*- and *y*-ions of inorganic pyrophosphatase (Ppa)  $^{88}\text{C}\#\text{RPVGVLK}^{95}$ , which forms an intermolecular disulfide bond at Cys88.

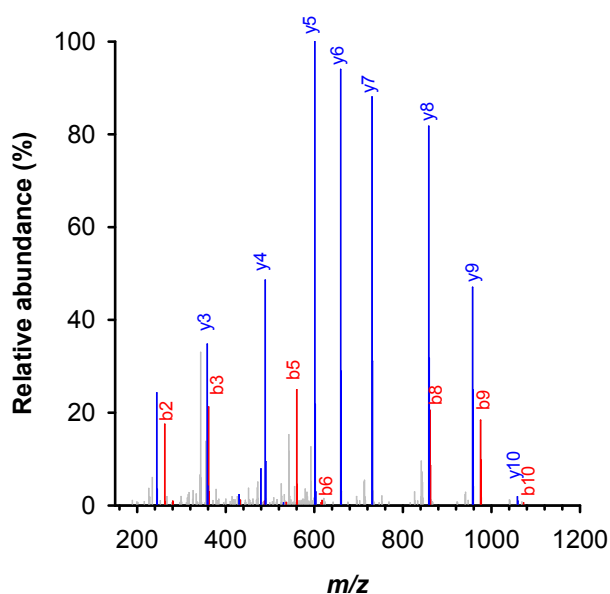

### Assigned *b*- and *y*-ions

| #  | <i>b</i> <sup>+</sup> | <i>b</i> <sup>++</sup> | Seq. | <i>y</i> <sup>+</sup> | <i>y</i> <sup>++</sup> | #  |
|----|-----------------------|------------------------|------|-----------------------|------------------------|----|
| 1  |                       |                        | C#   | 1218.6                | 609.8                  | 11 |
| 2  | 262.09                |                        | T    | 1058.57               | 529.79                 | 10 |
| 3  | 361.15                | 181.08                 | V    | 957.52                | 479.26                 | 9  |
| 4  | 489.21                | 245.11                 | Q    | 858.45                | 429.73                 | 8  |
| 5  | 560.25                | 280.63                 | A    | 730.39                | 365.7                  | 7  |
| 6  | 617.27                | 309.14                 | G    | 659.35                | 330.18                 | 6  |
| 7  | 730.36                | 365.68                 | L    | 602.33                | 301.67                 | 5  |
| 8  | 861.4                 | 431.2                  | M    | 489.25                | 245.13                 | 4  |
| 9  | 975.44                | 488.22                 | N    | 358.21                | 179.61                 | 3  |
| 10 | 1072.49               | 536.75                 | P    | 244.17                |                        | 2  |
| 11 |                       |                        | K    | 147.11                |                        | 1  |

Sequest results:  $z = +2$ ,  $m/z = 610.30$  (mass error: +92.58 ppm), Xcorr = 3.57, SpScore = 1754.18

**FIG S6(K)** Assignment of the tandem mass spectrum to the predicted *b*- and *y*-ions of translation initiation inhibitor (YoaB)  $^{93}\text{C}\#\text{TVQAGLMNPK}^{103}$ , which forms an intermolecular disulfide bond at Cys93.

**TABLE S1** Bacterial strains and plasmids used in this study

| Strains or plasmids                                              | Relevant characteristics                                        | References                |
|------------------------------------------------------------------|-----------------------------------------------------------------|---------------------------|
| <b>Strains of <i>Salmonella enterica</i> Serovar Typhimurium</b> |                                                                 |                           |
| ATCC14028S                                                       | wild-type                                                       | Fields et al., 1986       |
| <i>ΔmdsABC</i>                                                   | <i>ΔmdsABC::Cm<sup>R</sup></i>                                  | This study                |
| <i>ΔacrABΔtolC</i>                                               | <i>ΔacrABΔtolC::Tn<sup>R</sup></i>                              | This study                |
| <i>ΔacrABΔtolCΔmdsABC</i>                                        | <i>ΔacrABΔtolC::Tn<sup>R</sup> ΔmdsABC::Cm<sup>R</sup></i>      | This study                |
| <b>Plasmids</b>                                                  |                                                                 |                           |
| pKD3                                                             | rep <sub>R6Kγ</sub> [p] Ap <sup>R</sup> FRT Cm <sup>R</sup> FRT | Datsenko and Wanner, 2000 |
| pKAN6B                                                           | p15A <i>ori</i> , Km <sup>R</sup>                               | Yeom and Lee, 2006        |
| pMdsAB                                                           | <i>mdsAB</i> genes cloned into pKAN6B, Km <sup>R</sup>          | This study                |
| pMdsABC                                                          | <i>mdsABC</i> genes cloned into pKAN6B, Km <sup>R</sup>         | This study                |

**TABLE S2** Primers used in this study.

| Experiments   | Primer name               | Oligonucleotide sequence (5' to 3')                          |
|---------------|---------------------------|--------------------------------------------------------------|
| Gene deletion | AcrA-H1P1                 | TTGAAATCGGACACTCGAGGTTTACATATGAACAAAAACGTGTAGGCTGGAGCTGCTTC  |
|               | AcrB-H2P2                 | CGGCTAAAGCGGCGGCGTACCACCACGAAGAAGACCGGTATATGAATATCCTCCTTA    |
|               | TolC-H1P1                 | TCAGCGCTAAATACTGCTTCACAACAAGGAATGCAAATGAGCACCTGAAGTCAGCCCCA  |
|               | TolC-H2P2                 | TTGCCGTTATTGCTGTTGGCGCGAGCGGCGGTTCGGCTGTGAGTGGTGAATCCGTTAGCG |
|               | MdsA-H1P1                 | TGCGGAATGGCCGACACGCTGCGGTAAAGAGGGAAACGACGTGTAGGCTGGAGCTGCTTC |
|               | MdsC-H2P2                 | TAGCGCGCGCGCCGCACTGGCGACGCGGGCGCTATTTGGGCATATGAATATCCTCCTTAG |
| Gene cloning  | MdsA-F_ <i>Nde</i> I      | CGCATATGCGTAGAACATTCAAATTATGTTGATAGC                         |
|               | MdsB-R_ <i>Xba</i> I      | TATCTAGATTATGCTTGCTGATCATGCG                                 |
|               | MdsB-F_ <i>Sse</i> 8387I  | GGCCTGCAGGGTGAGTTTTATCGTCAG                                  |
|               | MdsB-R_ <i>Sse</i> 8387I  | AACTCACCTGCAGGCCCGCCAGGAATG                                  |
|               | MdsC-R_ His_ <i>Xba</i> I | CGTCTAGACTAATGATGATGATGATGACCTTGCTTTTTCTCACTGTATTCCCGCCA     |
| RT-PCR        | <i>mdsA</i> -F            | CTGTTTGCCCGAATCAGTTT                                         |
|               | <i>mdsA</i> -R            | AGTCAATGTCGCGGTCTGTT                                         |
|               | <i>mdsB</i> -F            | CGAATACCGGATTGCCTATG                                         |
|               | <i>mdsB</i> -R            | GAGATATGCCGTTCCACGTT                                         |
|               | <i>mdsC</i> -F            | CTTCCACGATCCGTTCTAC                                          |
|               | <i>mdsC</i> -R            | GCTAATGCCTGGTCGCTAAG                                         |
|               | <i>cdsA</i> -F            | GTCAACCGCTGGTTGAGATG                                         |
|               | <i>cdsA</i> -R            | ACCTTCGGCGCCAGCTTATG                                         |
|               | <i>pssA</i> -F            | CATTGATGATAGCGTCCTGTACAGCG                                   |
|               | <i>pssA</i> -R            | CCAGTACCGCTGGTAGATTGAAGTAAG                                  |
|               | <i>tolC</i> -F            | GCCCGTGCGCAATATGATACCGTACTGG                                 |
|               | <i>tolC</i> -R            | GCTGTATCAAGGTGGGATGGTAACTCG                                  |
|               | 16S rRNA-F                | CTGACGCTCAGGTGCGAAAG                                         |

|                |                      |
|----------------|----------------------|
| 16S rRNA-R     | TCACAACACGAGCTGACGAC |
| <i>dnaK</i> -F | CGTATGCCAATGGTGCAGAA |
| <i>dnaK</i> -R | ACTGGTTGTCTTCCGCAGTA |



**TABLE S3** Fatty acid methyl ester profiles of wild-type (WT), *mdsABC* deletion (DT), and *mdsABC* expression mutant (MT) strains of *S. Typhimurium* 14028S.

| Fatty acid components | WT        | DT        | MT          | Sum in Features     |
|-----------------------|-----------|-----------|-------------|---------------------|
| 13:0                  | 0.64±0.02 | 0.51±0.07 | 1.73±0.21   |                     |
| 14:1 ω5c              | 2.90±0.07 | 2.45±0.20 | 4.38±0.30   |                     |
| 14:0                  | 2.64±0.16 | 3.00±0.29 | 3.12±0.21   |                     |
| 15:0 anteiso          |           |           | 0.53±0.21   |                     |
| 14:0 2OH              |           |           | 1.29        |                     |
| Sum in Feature 2      | 7.32±0.24 | 8.51±0.99 | 8.15±1.07   | 14:0 3OH/16:1 iso I |
| 16:0 N alcohol        | 3.03±0.32 | 2.10±0.25 | 1.97        |                     |
| 16:1 ω11c             | 2.90±0.10 |           | 3.86±0.10   |                     |
| 16:1 ω5c              |           | 0.54      |             |                     |
| 16:1 ω7c alcohol      |           |           | 1.56±0.86   |                     |
| Sum in Feature 3      | 0.95±0.02 |           | 1.29±0.10   | 16:1 ω6c/16:1 ω7c   |
| 16:0                  | 36.2±1.49 | 38.8±4.24 | 40.6±0.36** |                     |
| 16:0 iso 3OH          | 3.09±0.25 | 4.40±0.21 | 3.55±0.01   |                     |
| 17:1 iso ω5c          |           | 11.6±1.19 |             |                     |
| 17:1 anteiso A        | 11.9±1.42 | 2.38±0.38 |             |                     |
| 17:1 anteiso ω9c      |           |           | 3.55±0.11   |                     |
| 17:0 cyclo            | 2.45±0.14 | 9.81      | 7.53        |                     |
| 17:0                  | 10.3±0.61 |           |             |                     |
| 18:3 ω6c (6,9,12)     | 3.65±0.22 | 2.99±0.28 | 3.55±0.20   |                     |
| 18:0                  | 5.28±0.20 | 6.03±0.25 | 5.02±0.22   |                     |
| 17:0 iso 3OH          | 1.28±0.90 | 1.37±0.52 | 1.90±0.61   |                     |
| 19:1 iso I            |           |           | 4.34        |                     |
| 19:0 iso              | 2.49±0.13 | 2.70±0.54 | 0.80±0.35   |                     |
| 19:0 cyclo ω8c        | 3.02±0.17 | 2.90±0.29 | 1.29±0.08   |                     |

A statistically significant difference in the level of palmitate (C<sub>16:0</sub>) methyl ester (\*\**P* < 0.01) analyzed by two-tailed *t*-test between the results obtained from three independent cultures of MT and WT strains in mMOPS media containing 0.1% glucose, 0.1% arabinose, and 100 μg mL<sup>-1</sup> kanamycin.

**TABLE S4** Mass spectrometry data of disulfide-forming proteins identified by diagonal gel analyses of cytosolic and membrane fractions obtained from *Salmonella enterica* serovar Typhimurium 14028S.

| Spot# | GI number | Gene | Protein description                    | Score   | Coverage | # Unique peptides | #PSM   | MW[kDa]  | calc. pI         | Reactive cysteine |
|-------|-----------|------|----------------------------------------|---------|----------|-------------------|--------|----------|------------------|-------------------|
|       |           |      | Peptide sequence                       | SpScore | XCorr    | #PSM              | Charge | MH+ [Da] | $\Delta$ M [ppm] | m/z [Da]          |
| C1    | 378450316 | adhE | acetaldehyde-CoA/alcohol dehydrogenase | 175.13  | 27.02    | 19                | 56     | 96.15    | 6.65             | C246              |
|       |           |      | AADIVLQAAIAAGAPK                       | 3303.03 | 5.42     | 5                 | 2      | 1480.27  | -324.81          | 740.64            |
|       |           |      | mVAESGmGIVEDK                          | 1995.74 | 3.95     | 4                 | 2      | 1470.09  | 280.13           | 735.55            |
|       |           |      | YAEIADHLGLSAPGDR                       | 1846.01 | 3.90     | 2                 | 3      | 1685.36  | -281.93          | 562.46            |
|       |           |      | MAVAESGmGIVEDK                         | 1811.94 | 3.80     | 2                 | 2      | 1452.47  | -835.75          | 726.74            |
|       |           |      | GSLPIALDEVITDGHK                       | 779.16  | 3.70     | 1                 | 2      | 1665.34  | -329.78          | 833.17            |
|       |           |      | AAALAAADAR                             | 1394.47 | 3.69     | 8                 | 2      | 900.76   | -276.74          | 450.88            |
|       |           |      | EAGVQEADFLAHVDK                        | 756.41  | 3.63     | 1                 | 2      | 1629.34  | -263.55          | 815.17            |
|       |           |      | FLFNNGYADQITSVLK                       | 1047.51 | 3.62     | 2                 | 2      | 1831.58  | 272.46           | 916.29            |
|       |           |      | NHFASEYIYNAYKDEK                       | 970.73  | 3.60     | 1                 | 3      | 1993.07  | -36.51           | 665.03            |
|       |           |      | NGALNAAIVGQPAYK                        | 1797.52 | 3.57     | 5                 | 2      | 1489.17  | 983.98           | 745.09            |
|       |           |      | AVASVLmSK                              | 857.34  | 3.24     | 2                 | 2      | 921.99   | -158.78          | 461.50            |
|       |           |      | AKDFEEAVEK                             | 1109.82 | 3.19     | 4                 | 3      | 1166.25  | -16.69           | 389.42            |
|       |           |      | YNANDNPTK                              | 867.23  | 3.15     | 4                 | 2      | 1036.96  | -109.32          | 518.98            |
|       |           |      | EYASFTQEQVDK                           | 975.61  | 3.09     | 2                 | 2      | 1445.06  | -319.88          | 723.04            |
|       |           |      | FASHGGYmLQGQELK                        | 447.43  | 2.99     | 1                 | 3      | 1682.58  | -191.32          | 561.53            |
|       |           |      | IAELAGFSVPETTK                         | 662.44  | 2.97     | 3                 | 2      | 1463.30  | -254.29          | 732.15            |
|       |           |      | NAIFSPHPR                              | 1168.26 | 2.91     | 4                 | 2      | 1152.35  | 8.67             | 576.68            |
|       |           |      | QILLDTYYGR                             | 426.33  | 2.84     | 1                 | 2      | 1243.38  | 769.78           | 622.19            |
|       |           |      | AVASVLMSK                              | 623.89  | 2.63     | 1                 | 2      | 905.98   | -166.69          | 453.50            |
|       |           |      | DFTEGEVAAK                             | 565.90  | 2.54     | 1                 | 2      | 1066.85  | -269.61          | 533.93            |
|       |           |      | YPLISELK                               | 804.04  | 2.50     | 2                 | 2      | 962.40   | -797.28          | 481.70            |
| M1    | 378451702 | cysJ | sulfite reductase subunit alpha        | 75.58   | 17.53    | 10                | 23     | 66.44    | 5.03             | C162, C552        |
|       |           |      | AGGASSFLADRVEEEGEVR                    | 1603.29 | 5.09     | 3                 | 3      | 1979.80  | -148.99          | 660.61            |
|       |           |      | VTLISASQTGNAR                          | 1474.48 | 3.65     | 4                 | 2      | 1318.13  | -260.78          | 659.57            |
|       |           |      | HIEIDLGDSEGLR                          | 1556.58 | 3.60     | 2                 | 2      | 1324.46  | -761.59          | 662.73            |
|       |           |      | VDADVEYQAAASEWR                        | 2062.93 | 3.52     | 1                 | 2      | 1709.95  | -497.45          | 855.48            |
|       |           |      | GDEPVTVDGK                             | 1002.81 | 3.34     | 4                 | 2      | 1016.79  | -284.59          | 508.90            |

|    |           |      |                                             |         |       |   |    |         |          |           |
|----|-----------|------|---------------------------------------------|---------|-------|---|----|---------|----------|-----------|
|    |           |      | DAPLIATLSVNQK                               | 894.71  | 3.23  | 1 | 2  | 1370.17 | -306.72  | 685.59    |
|    |           |      | AGGASSFLADR                                 | 1418.53 | 3.18  | 2 | 2  | 1052.13 | -2.13    | 526.57    |
|    |           |      | SGAVAVTPVPER                                | 421.11  | 3.12  | 4 | 2  | 1182.90 | -376.95  | 591.96    |
|    |           |      | VEEEGEVR                                    | 656.32  | 2.98  | 1 | 2  | 946.87  | -131.99  | 473.94    |
|    |           |      | SELLPLVGDK                                  | 1060.27 | 2.85  | 1 | 2  | 1158.04 | -257.66  | 579.52    |
| M2 | 378449732 | oppA | ABC transporter periplasmic binding protein | 58.16   | 19.12 | 8 | 17 | 59.99   | 7.15     | C297-C443 |
|    |           |      | DANDYPVGNDVTADVAIR                          | 862.84  | 5.10  | 3 | 2  | 1906.57 | 291.52   | 953.79    |
|    |           |      | FSDGSPLTAEDVVFTYNK                          | 1092.29 | 4.51  | 4 | 3  | 1991.04 | -61.95   | 664.35    |
|    |           |      | IAPSmAVAPQQDNLK                             | 608.67  | 3.60  | 2 | 2  | 1599.30 | -344.18  | 800.15    |
|    |           |      | LVFVFLDEDNAYAAAR                            | 1205.06 | 3.28  | 1 | 2  | 1815.74 | 387.75   | 908.37    |
|    |           |      | LTLWYASGDSTR                                | 1049.38 | 3.26  | 1 | 2  | 1370.21 | -219.29  | 685.61    |
|    |           |      | IAPSM AVAPQQDNLK                            | 907.18  | 3.25  | 1 | 2  | 1584.08 | 145.48   | 792.54    |
|    |           |      | IDmGNFSHAR                                  | 759.35  | 3.02  | 1 | 2  | 1165.22 | 799.49   | 583.11    |
|    |           |      | AINYAINR                                    | 288.97  | 2.32  | 1 | 1  | 934.47  | -639.77  | 934.47    |
|    |           |      | DLAEAVR                                     | 326.85  | 2.16  | 3 | 1  | 773.45  | -534.44  | 773.45    |
| M3 | 378452157 | codA | cytosine deaminase                          | 32.71   | 13.15 | 4 | 9  | 47.60   | 6.40     | [c215]    |
|    |           |      | LGADVIGAIPHFEFTR                            | 1401.33 | 4.07  | 4 | 2  | 1743.55 | -258.38  | 872.28    |
|    |           |      | THVDVSDPTLTALK                              | 1121.49 | 3.71  | 2 | 2  | 1498.33 | 425.72   | 749.67    |
|    |           |      | FVETVAALHR                                  | 1069.26 | 3.49  | 2 | 2  | 1214.08 | -274.13  | 607.54    |
|    |           |      | LIDVHcDEIDDEQSR                             | 1029.82 | 3.48  | 1 | 2  | 1844.44 | -278.26  | 922.72    |
| M4 | 378450822 | fba  | fructose-bisphosphate aldolase              | 83.30   | 24.57 | 7 | 23 | 38.06   | 6.87     | C112      |
|    |           |      | AGLINSGGADGGDTDLGDAVR                       | 1959.55 | 5.60  | 3 | 2  | 1931.54 | -240.97  | 966.28    |
|    |           |      | LINAVQDVYLDSK                               | 1734.97 | 4.42  | 3 | 2  | 1478.48 | -138.71  | 739.74    |
|    |           |      | LTSDNPIDLVR                                 | 1368.38 | 3.70  | 6 | 2  | 1243.02 | -305.08  | 622.02    |
|    |           |      | RQIEEISAAFER                                | 918.06  | 3.58  | 1 | 2  | 1448.34 | -874.36  | 724.67    |
|    |           |      | AGGmGLILGR                                  | 1442.83 | 3.48  | 2 | 2  | 961.10  | -75.33   | 481.05    |
|    |           |      | DADSLQHR                                    | 1248.29 | 3.36  | 5 | 2  | 1054.31 | -780.15  | 527.66    |
|    |           |      | AVNFGYTDDR                                  | 1108.35 | 3.29  | 1 | 2  | 1158.18 | -29.11   | 579.59    |
|    |           |      | AGGMGLILGR                                  | 1038.68 | 2.96  | 2 | 2  | 943.95  | -1301.60 | 472.48    |
| M5 | 378453486 | iaaA | isoaspartyl dipeptidase                     | 15.74   | 11.28 | 3 | 5  | 40.30   | 5.96     | C229      |
|    |           |      | SAAPSGNQLASmAAESR                           | 560.19  | 4.03  | 2 | 2  | 1664.20 | -354.39  | 832.61    |
|    |           |      | LTEAGITTVVGLLGTDVSR                         | 637.37  | 3.43  | 2 | 2  | 1990.38 | 58.96    | 995.69    |
|    |           |      | DVALIDR                                     | 387.07  | 1.92  | 1 | 1  | 801.59  | -411.50  | 801.59    |
| M6 | 378451259 | bamB | outer membrane protein subunit              | 15.51   | 12.76 | 3 | 4  | 41.92   | 4.86     | C20       |

|    |           |      |                                         |         |       |    |      |         |         |                |
|----|-----------|------|-----------------------------------------|---------|-------|----|------|---------|---------|----------------|
|    |           |      | VDSSGFLTEPTVADGK                        | 1209.26 | 4.37  | 2  | 2    | 1623.33 | -261.30 | 812.17         |
|    |           |      | GESAPATAFGAAIVGGDNGR                    | 1559.00 | 4.22  | 1  | 2    | 1819.22 | 155.59  | 910.12         |
|    |           |      | ELGSVNDFIVDGDR                          | 994.94  | 3.38  | 1  | 2    | 1536.32 | -208.91 | 768.66         |
| M7 | 378450994 | glpQ | glycerophosphodiester phosphodiesterase | 126.36  | 39.33 | 14 | 41   | 40.40   | 6.05    | [c206]         |
|    |           |      | AGVDGLFTDFPDK                           | 1718.95 | 4.52  | 8  | 2    | 1382.28 | -169.35 | 691.64         |
|    |           |      | DDHLVVLHDHYLDR                          | 1497.59 | 4.03  | 5  | 3    | 1747.69 | -124.78 | 583.24         |
|    |           |      | LTGMVQDAHQNK                            | 1239.44 | 3.78  | 3  | 2    | 1342.06 | -343.45 | 671.53         |
|    |           |      | LTGmVQDAHQNK                            | 778.12  | 3.64  | 5  | 2    | 1358.31 | -151.07 | 679.66         |
|    |           |      | QDNVYLQcFDVAELK                         | 1174.74 | 3.21  | 1  | 2    | 1842.94 | -68.95  | 921.97         |
|    |           |      | GASGYLPEHTLPAK                          | 701.01  | 2.97  | 4  | 2    | 1441.39 | -164.07 | 721.20         |
|    |           |      | YYAIDFTLDEIK                            | 788.96  | 2.90  | 1  | 2    | 1491.25 | -289.04 | 746.13         |
|    |           |      | IKNELEPK                                | 1233.20 | 2.84  | 5  | 3    | 971.24  | 98.08   | 324.42         |
|    |           |      | VTDVADRFPDR                             | 502.41  | 2.80  | 1  | 3    | 1291.88 | 369.02  | 431.30         |
|    |           |      | FTEGFDIENGK                             | 1130.86 | 2.80  | 2  | 2    | 1258.07 | 575.16  | 629.54         |
|    |           |      | TLEVLKK                                 | 536.04  | 2.67  | 1  | 2    | 830.97  | -88.65  | 415.99         |
|    |           |      | FTEGFDIENGKK                            | 1150.94 | 2.62  | 1  | 2    | 1386.29 | 555.20  | 693.65         |
|    |           |      | MVVHPYTVR                               | 546.27  | 2.59  | 1  | 2    | 1101.98 | -338.59 | 551.49         |
|    |           |      | YGYTGK                                  | 396.56  | 2.08  | 2  | 1    | 688.45  | -452.84 | 688.45         |
|    |           |      | AVMFLQK                                 | 660.79  | 1.94  | 1  | 1    | 836.50  | -691.93 | 836.50         |
| M8 | 378451892 | ansB | L-asparaginase II                       | 159.50  | 37.93 | 10 | 46   | 36.90   | 6.25    | C99-C127       |
|    |           |      | VGIVYNYANASDLPAK                        | 2042.38 | 4.98  | 6  | 2.00 | 1695.52 | -234.94 | 848.26         |
|    |           |      | GVLVVmNDTVMDGR                          | 1821.96 | 4.51  | 7  | 2.00 | 1523.39 | 393.49  | 762.20         |
|    |           |      | VPTGATTQDAEVDDAK                        | 1281.33 | 4.36  | 5  | 2.00 | 1618.47 | -136.10 | 809.74         |
|    |           |      | GVLVVmNDTVmDGR                          | 1717.43 | 4.28  | 6  | 2.00 | 1538.13 | -425.90 | 769.57         |
|    |           |      | VLLQLALTQTK                             | 1996.12 | 4.14  | 3  | 2.00 | 1228.16 | -289.89 | 614.59         |
|    |           |      | YGFVASGTLNPQK                           | 1761.46 | 4.12  | 6  | 2.00 | 1382.14 | -304.74 | 691.57         |
|    |           |      | VGVENLVDAVPQLK                          | 1287.96 | 4.08  | 2  | 2.00 | 1481.45 | -190.69 | 741.23         |
|    |           |      | GVLVVMNDTVMDGR                          | 751.51  | 3.39  | 1  | 2.00 | 1507.44 | 433.05  | 754.22         |
|    |           |      | AVNYGPLGYIHNGK                          | 1115.02 | 3.00  | 2  | 2.00 | 1504.43 | 486.57  | 752.72         |
|    |           |      | TVFDTLATAAHNGTVVVR                      | 763.03  | 2.97  | 2  | 2.00 | 1873.66 | 285.37  | 937.33         |
|    |           |      | TNTTDVATFK                              | 507.19  | 2.69  | 1  | 2.00 | 1097.89 | -278.76 | 549.45         |
|    |           |      | DIADVVK                                 | 597.29  | 2.00  | 5  | 1.00 | 644.47  | -488.65 | 644.47         |
| M9 | 378448281 | talB | transaldolase B                         | 517.55  | 47.95 | 17 | 172  | 35.15   | 5.22    | [c167], [c239] |

|     |           |      |                                                        |         |       |    |    |         |         |                       |
|-----|-----------|------|--------------------------------------------------------|---------|-------|----|----|---------|---------|-----------------------|
|     |           |      | QFTTVVADTGDIAAmK                                       | 1588.68 | 4.84  | 10 | 2  | 1684.47 | -258.64 | 842.74                |
|     |           |      | LYNDAGISNDR                                            | 1863.40 | 4.28  | 20 | 2  | 1238.25 | -39.43  | 619.63                |
|     |           |      | NVGEILELAGcDR                                          | 1551.42 | 3.89  | 6  | 2  | 1446.46 | -111.11 | 723.74                |
|     |           |      | QFTTVVADTGDIAAMK                                       | 1439.22 | 3.76  | 7  | 2  | 1668.37 | -321.20 | 834.69                |
|     |           |      | LIDDAVAWAK                                             | 795.94  | 3.75  | 5  | 2  | 1102.09 | -167.14 | 551.55                |
|     |           |      | KLIDDAVAWAK                                            | 2029.07 | 3.72  | 4  | 2  | 1230.23 | -180.14 | 615.62                |
|     |           |      | ELAESEGAIER                                            | 1277.35 | 3.62  | 20 | 2  | 1204.18 | -84.40  | 602.59                |
|     |           |      | LSYDTEASIAK                                            | 1087.50 | 3.57  | 19 | 2  | 1198.19 | -104.75 | 599.60                |
|     |           |      | AcAEAGVYLISPFVGR                                       | 1412.76 | 3.55  | 7  | 3  | 1710.65 | -201.88 | 570.89                |
|     |           |      | AQQVVDATDK                                             | 865.02  | 3.20  | 42 | 2  | 1074.98 | -169.30 | 537.99                |
|     |           |      | QHGYETVVMGASFR                                         | 808.24  | 3.06  | 3  | 3  | 1582.87 | 56.39   | 528.30                |
|     |           |      | LSYDTEASIAKAK                                          | 1481.48 | 2.99  | 2  | 2  | 1396.19 | -984.86 | 698.60                |
|     |           |      | QHGYETVVmGASFR                                         | 1096.00 | 2.94  | 7  | 3  | 1598.54 | -151.27 | 533.52                |
|     |           |      | LASTWQGIR                                              | 1027.19 | 2.93  | 3  | 2  | 1032.00 | -178.63 | 516.51                |
|     |           |      | KLIDDAVAwAK                                            | 1017.62 | 2.87  | 1  | 2  | 1245.74 | -573.99 | 623.37                |
|     |           |      | NVGEILELAGCDR                                          | 1541.44 | 2.82  | 1  | 2  | 1389.76 | 133.21  | 695.38                |
|     |           |      | LIDDAVAwAK                                             | 753.01  | 2.74  | 2  | 2  | 1118.14 | -119.99 | 559.57                |
|     |           |      | KFAVDQEK                                               | 832.95  | 2.57  | 3  | 2  | 964.92  | -180.53 | 482.96                |
|     |           |      | IKLYNDAGISNDR                                          | 696.51  | 2.45  | 1  | 2  | 1591.41 | -871.96 | 796.21                |
|     |           |      | KLSFSGEVK                                              | 386.45  | 1.94  | 4  | 1  | 994.70  | -471.36 | 994.70                |
|     |           |      | ISTEVDAR                                               | 154.67  | 1.93  | 1  | 1  | 890.48  | -544.29 | 890.48                |
|     |           |      | FAVDQEK                                                | 503.04  | 1.89  | 4  | 1  | 836.42  | -598.36 | 836.42                |
| M10 | 378451863 | speB | agmatinase                                             | 81.16   | 22.88 | 5  | 22 | 33.58   | 5.59    | [c88]                 |
|     |           |      | LNVVDcGDLVYAFGDAR                                      | 1657.42 | 5.49  | 7  | 2  | 1884.43 | -361.49 | 942.72                |
|     |           |      | mLSFGGDHFVTLPLLR                                       | 964.48  | 4.87  | 4  | 2  | 1819.43 | -405.02 | 910.22                |
|     |           |      | GVDDILAQVK                                             | 1387.00 | 3.79  | 8  | 2  | 1057.92 | -281.25 | 529.47                |
|     |           |      | EGLIDPHHSVQIGIR                                        | 668.45  | 3.34  | 1  | 3  | 1671.81 | -55.66  | 557.94                |
|     |           |      | MLSFGGDHFVTLPLLR                                       | 529.60  | 2.82  | 1  | 3  | 1802.77 | -774.38 | 601.60                |
|     |           |      | QVSTNLAWEHHR                                           | 371.12  | 2.81  | 1  | 2  | 1478.35 | -177.72 | 739.68                |
| M11 | 378452068 |      | $\alpha$ -dehydro- $\beta$ -deoxy-D-glucarate aldolase | 6.69    | 10.55 | 2  | 2  | 27.30   | 6.29    | [c213]                |
|     |           |      | AHGKPeGILAPVEADAR                                      | 772.98  | 3.67  | 1  | 3  | 1763.61 | 325.79  | 588.54                |
|     |           |      | VPTNEPVIK                                              | 488.23  | 3.02  | 1  | 2  | 1110.13 | -187.66 | 555.57                |
| M12 | 378453554 | deoD | purine nucleoside phosphorylase                        | 183.97  | 39.33 | 10 | 54 | 25.96   | 5.86    | [c70], [c111], [c201] |
|     |           |      | DHDFAAIADFDmVR                                         | 2476.56 | 5.52  | 3  | 2  | 1624.27 | 296.88  | 812.64                |

|     |           |      |                           |         |       |     |     |         |         |           |
|-----|-----------|------|---------------------------|---------|-------|-----|-----|---------|---------|-----------|
|     |           |      | FKDHDFAAIADFDmVR          | 1613.00 | 4.49  | 5   | 3   | 1915.01 | -69.45  | 639.01    |
|     |           |      | DHDFAAIADFDmVR            | 2427.61 | 4.46  | 6   | 2   | 1638.58 | -738.63 | 819.79    |
|     |           |      | FKDHDFAAIADFDMVR          | 1411.23 | 4.40  | 3   | 3   | 1898.93 | -108.89 | 633.65    |
|     |           |      | IALESVLLGDKE              | 2461.87 | 4.24  | 8   | 2   | 1287.30 | -151.66 | 644.15    |
|     |           |      | LRDVVIGMGAcTDSK           | 2004.17 | 4.13  | 3   | 3   | 1622.17 | -457.40 | 541.39    |
|     |           |      | DVVIGMGAcTDSK             | 1153.89 | 3.82  | 3   | 2   | 1354.15 | 431.88  | 677.58    |
|     |           |      | LRDVVIGmGAcTDSK           | 1546.66 | 3.74  | 3   | 3   | 1638.18 | -445.00 | 546.73    |
|     |           |      | IALESVLLGDK               | 1314.29 | 3.64  | 2   | 2   | 1158.02 | -308.05 | 579.52    |
|     |           |      | HIAETFLNVR                | 628.39  | 3.62  | 5   | 2   | 1329.25 | -187.92 | 665.13    |
|     |           |      | DVVIGmGAcTDSK             | 863.62  | 3.59  | 4   | 2   | 1370.11 | 404.30  | 685.56    |
|     |           |      | ALTlcTVSDHIR              | 950.20  | 2.97  | 2   | 2   | 1386.36 | -188.23 | 693.68    |
|     |           |      | ISVMGHGmGIPScSIYTK        | 700.74  | 2.88  | 1   | 3   | 1955.02 | -161.73 | 652.34    |
|     |           |      | GmLGFTGTYK                | 868.84  | 2.86  | 4   | 2   | 1090.79 | -446.47 | 545.90    |
|     |           |      | GMLGFTGTYK                | 516.43  | 2.85  | 2   | 2   | 1075.86 | 544.69  | 538.43    |
| M13 | 378448475 | yadF | carbonic anhydrase        | 113.24  | 26.36 | 6   | 38  | 24.81   | 6.04    | C42, C101 |
|     |           |      | mKDIDTLISNNALWSK          | 1895.57 | 3.99  | 1   | 3   | 1867.11 | 512.36  | 623.04    |
|     |           |      | mLVEEDPGFFEK              | 1183.22 | 3.83  | 8   | 2   | 1458.00 | 243.22  | 729.50    |
|     |           |      | LTGLEPGELFVHR             | 875.22  | 3.60  | 4   | 2   | 1468.15 | -370.78 | 734.58    |
|     |           |      | DIDTLISNNALWSK            | 1280.97 | 3.60  | 1   | 2   | 1591.62 | 533.11  | 796.32    |
|     |           |      | MLVEEDPGFFEK              | 1315.65 | 3.53  | 7   | 2   | 1441.07 | -400.24 | 721.04    |
|     |           |      | DLDTVATNR                 | 1103.11 | 3.37  | 15  | 2   | 1004.97 | -100.61 | 502.99    |
|     |           |      | GISALSLK                  | 664.36  | 2.05  | 2   | 1   | 788.58  | -483.85 | 788.58    |
| M14 | 378449942 | sodB | Fe-superoxide dismutase   | 1275.61 | 33.16 | 6   | 321 | 21.32   | 5.95    | C80       |
|     |           |      | LADAIAASFGSFAEFK          | 2569.42 | 6.24  | 247 | 2   | 1646.55 | 420.58  | 823.78    |
|     |           |      | HHQTYVTNLNNLIK            | 2712.20 | 4.78  | 33  | 3   | 1695.17 | -442.68 | 565.73    |
|     |           |      | NFGSGWTWLK                | 658.88  | 3.15  | 8   | 2   | 1295.15 | -262.73 | 648.08    |
|     |           |      | AQFTDAAIK                 | 533.04  | 2.37  | 21  | 1   | 964.62  | -492.21 | 964.62    |
|     |           |      | GTAfEGKSLEEIVR            | 294.51  | 2.30  | 1   | 2   | 1535.43 | -846.81 | 768.22    |
|     |           |      | SLEEIVR                   | 383.04  | 2.04  | 11  | 1   | 845.54  | -516.69 | 845.54    |
| M15 | 378453372 | ppa  | inorganic pyrophosphatase | 106.03  | 49.43 | 10  | 38  | 19.66   | 5.17    | [c88]     |
|     |           |      | YEVDKESGALFVDR            | 2335.63 | 4.84  | 4   | 2   | 1628.37 | -251.54 | 814.69    |
|     |           |      | EYDHIKDVNDLPPELLK         | 413.68  | 3.58  | 4   | 3   | 1943.04 | 442.01  | 648.35    |
|     |           |      | AEIVASFER                 | 1126.17 | 3.20  | 6   | 2   | 1021.93 | -212.56 | 511.47    |
|     |           |      | VDGWDNAEAAK               | 1181.83 | 3.11  | 4   | 2   | 1176.00 | -198.31 | 588.50    |

|     |           |      |                                           |         |       |    |     |         |         |                              |
|-----|-----------|------|-------------------------------------------|---------|-------|----|-----|---------|---------|------------------------------|
|     |           |      | ESGALFVDR                                 | 685.57  | 3.05  | 5  | 2   | 993.89  | -204.90 | 497.45                       |
|     |           |      | VDGwDNAEAAK                               | 1421.94 | 3.01  | 1  | 2   | 1191.92 | -256.30 | 596.46                       |
|     |           |      | cRPVGVLMKMTDESGEDAK                       | 506.29  | 2.95  | 1  | 2   | 1993.06 | -104.46 | 997.04                       |
|     |           |      | DVNDLPELLK                                | 679.81  | 2.93  | 4  | 2   | 1156.17 | -133.35 | 578.59                       |
|     |           |      | cRPVGVLK                                  | 916.78  | 2.62  | 4  | 3   | 929.17  | -4.16   | 310.40                       |
|     |           |      | AQITHFFEHYK                               | 247.91  | 2.59  | 2  | 3   | 1422.11 | 355.55  | 474.71                       |
|     |           |      | LVAVPHTK                                  | 672.73  | 2.57  | 3  | 2   | 864.79  | -320.23 | 432.90                       |
| M16 | 378449942 | sodB | superoxide dismutase                      | 206.29  | 8.29  | 1  | 50  | 21.32   | 5.95    | C42, C101                    |
|     |           |      | LADAIAASFGSFAEFK                          | 1946.58 | 5.43  | 50 | 2   | 1646.26 | 247.89  | 823.63                       |
| M17 | 378453420 | yjgF | putative translation initiation inhibitor | 81.02   | 34.38 | 5  | 25  | 13.57   | 5.24    | C107                         |
|     |           |      | TGAVAEDVSAQAR                             | 1475.25 | 4.13  | 14 | 2   | 1275.15 | -162.26 | 638.08                       |
|     |           |      | IEIEAIAVR                                 | 1060.29 | 3.48  | 5  | 2   | 1014.60 | 387.52  | 507.81                       |
|     |           |      | QSLNVKAIVEAAGLK                           | 593.73  | 2.67  | 1  | 2   | 1669.84 | -666.38 | 835.42                       |
|     |           |      | AIVEAAGLK                                 | 848.47  | 2.34  | 4  | 1   | 871.57  | -555.47 | 871.57                       |
|     |           |      | TTVFVK                                    | 549.51  | 1.95  | 1  | 1   | 694.49  | -514.24 | 694.49                       |
| M18 | 378450404 | yoaB | putative translation initiation inhibitor | 127.20  | 43.86 | 5  | 43  | 12.58   | 5.01    | [c93]                        |
|     |           |      | AWDAWVVAGHAPVR                            | 1813.58 | 4.49  | 6  | 2   | 1536.28 | 344.97  | 768.64                       |
|     |           |      | ILDATIFLSDK                               | 1117.93 | 4.00  | 7  | 2   | 1236.23 | -176.60 | 618.62                       |
|     |           |      | AWDAwVVAGHAPVR                            | 1835.62 | 3.62  | 1  | 2   | 1551.36 | -252.32 | 776.18                       |
|     |           |      | cTVQAGLMNPK                               | 1754.18 | 3.57  | 2  | 2   | 1219.59 | 92.58   | 610.30                       |
|     |           |      | cTVQAGLmNPK                               | 987.95  | 3.51  | 11 | 2   | 1235.75 | 227.18  | 618.38                       |
|     |           |      | AwDAwVVAGHAPVR                            | 766.89  | 2.74  | 1  | 2   | 1567.05 | -446.49 | 784.03                       |
|     |           |      | ADFAAMNK                                  | 614.06  | 2.45  | 12 | 1   | 867.43  | -657.57 | 867.43                       |
|     |           |      | YKVEIK                                    | 507.41  | 1.98  | 3  | 1   | 779.55  | -524.35 | 779.55                       |
| M19 | 378452286 | slyD | peptidyl-prolyl cis-trans isomerase       | 401.36  | 18.88 | 4  | 134 | 20.77   | 4.93    | C167, C168, C184, C185, C193 |
|     |           |      | DVFMGVDELQVGMR                            | 1892.09 | 4.32  | 1  | 2   | 1596.29 | -367.47 | 798.65                       |
|     |           |      | DVFmGVDELQVGMR                            | 1956.93 | 4.23  | 9  | 2   | 1612.43 | -276.66 | 806.72                       |
|     |           |      | DVFmGVDELQVGmR                            | 2181.88 | 4.13  | 38 | 2   | 1629.19 | 195.60  | 815.10                       |
|     |           |      | FNVEVVAIR                                 | 1564.78 | 3.76  | 42 | 2   | 1046.47 | -737.43 | 523.74                       |
|     |           |      | DLVVSLAYQVR                               | 1255.34 | 3.65  | 42 | 2   | 1263.88 | 312.81  | 632.44                       |
|     |           |      | VPKDVFMGVDELQVGmR                         | 524.67  | 3.34  | 2  | 2   | 1952.51 | -403.11 | 976.76                       |

*Footnotes.*

Protein spots excised from diagonal gels are same as shown in Fig. 5A in the main text.

Gene symbols were obtained from identical genes in the GenBank and UniProtKB/Swiss-Prot databases of *S. enteria*, except for  $\alpha$ -dehydro- $\beta$ -deoxy-D-glucarate aldolase (PRK10558).

Protein spots excised from diagonal gels were differently modified by N-ethylmaleimide and iodoacetamide, respectively, before and after the reduction of disulfide bond with dithioreitol in order to identify free thiol and disulfide cysteine residues.

Proteins were identified by using the Sequest search engine of Thermo Proteome Discoverer version 1.3 against the database of *S. Typhimurium* 14028S (downloaded from GenBank) and the common Repository of Adventitious Proteins (downloaded from URL <ftp://ftp.thegpm.org/fasta/cRAP>) with the following options: average mass ( $m/z$ ); 1 miscleavage site of trypsin digestion; precursor mass tolerance, 1.5 Da; fragment mass error, 0.8 Da; variable modifications for N-ethylmaleimide of free cysteine (designated as C#), carbamidomethylation of cysteine (lowercase 'c'), oxidation of methionine (lowercase 'm') and tryptophan (lowercase 'w').

Peptide spectrum matches (PSMs) were filtered out with the probability of >0.99 and the target-decoy false-discovery rate (FDR) of <0.01.

Disulfide-formed cysteines modified by iodoacetamide (lowercase 'c') are shown in the brackets with the positions in the protein sequence, and tandem mass spectra of identified peptides are shown in Fig. S5.

The predicted positions of reactive cysteine (uppercase 'C') and intramolecular disulfide (hyphen between 'C-C') analyzed from the UniProtKB/Swiss-Prot database are included in the list of Reactive cysteines.



## Supplementary References

- Datsenko KA, Wanner BL. 2000. One-step inactivation of chromosomal genes in *Escherichia coli* K-12 using PCR products. *Proc. Natl. Acad. Sci. USA* 97:6640-6645.
- Fields PI, Swanson RV, Haidaris CG, Heffron F. 1986. Mutants of *Salmonella typhimurium* that cannot survive within the macrophage are avirulent. *Proc. Natl. Acad. Sci. USA* 83:5189-5193.
- Song S, Hwang S, Lee S, Ha NC, Lee K. 2014. Interaction mediated by the putative tip regions of MdsA and MdsC in the formation of *Salmonella*-specific tripartite efflux pump. *PLoS ONE*. 9:e100881.
- Yeom JH, Lee K. 2006. RraA rescues *Escherichia coli* cells over-producing RNase E from growth arrest by modulating the ribonucleolytic activity. *Biochem. Biophys. Res. Commun.* 345:1372-1376.
